# Supplementary material
Source: PubMed Central journal article supplement (PMC4267252)
Supplement: NIHMS648038-supplement-Supplement.pdf [file NIHMS648038-supplement-Supplement.pdf]

*Ecological Archives*

Brian Dennis, José Miguel Ponciano. 2014. Density dependent state space model for population abundance data with unequal time intervals. *Ecology* VOL:pp-pp.

Supplement.

This supplement contains three R scripts: (1) RUNNING-ROUSS.R calculates maximum likelihood and restricted maximum likelihood estimates for the Ornstein Uhlenbeck state space model (stationary and non-stationary), using population abundance data having possibly unequal observation time intervals. (2) RUNNING-PBLRT.R performs parametric bootstrap likelihood ratio test of exponential growth state space model vs. Ornstein-Uhlenbeck state space model. (3) ROUSSE-1.0.R contains the functions used in statistical inferences for the Ornstein-Uhlenbeck state space model. ROUSSE-1.0.R is called by both RUNNING-ROUSS.R and RUNNING-PBLRT.R and must be present (as a file by that name) in the working directory of R.

```
#=====
# RUNNING-ROUSS.R: calculates maximum likelihood and restricted
# maximum likelihood estimates for the Ornstein-Uhlenbeck state space
# model (stationary and non-stationary), using population abundance
# data having possibly unequal observation time intervals. The script
# ROUSSE-1.0.R must be present in the working directory of R.
# Be patient; R is slow.
#=====

#-----
# Load all the OUSS model functions and needed packages
#-----
library("MASS")
source("ROUSSE-1.0.R")

#-----
# USER INPUT SECTION
#-----
# User supplies time series data here into the vector "Observed.t."
# User can substitute R statements to read population abundance data
```

```

# from a file into the vector "Observed.t". No zeros! Do not change
# the object name "Observed.t". Times of observation are entered into
# the vector "Time.t". Do not change the object name "Time.t".

# First example data set is bobcat (Lynx rufus) in Idaho, data set
# 212 from the Global Population Dynamics Database. Various other data
# sets are also included. Pick any of these data sets and associated
# sampling years by "commenting out" the Idaho bobcat data and
# "uncommenting" the desired data.

# Lynx rufus, from Idaho, GPPD data set 212
Observed.t=c(346,675,802,1478,1173,756,861,972,854,1161,1318,901,901,
1173,608,811,903,584,1179,1020,1129,966) # No zeros!
Time.t=c(1956,1957,1958,1959,1960,1961,1962,1963,1964,1965,1970,1971,
1972,1973,1974,1975,1976,1977,1978,1979,1980,1981)

# Lynx rufus, from Florida, GPPD data set 211.
# Time.t=c(1946,1947,1948,1949,1950,1954,1955,1956,1957,1958,
# 1959,1960,1961,1963,1964,1965,1966,1967,1968,1975,1976,1977,
# 1978,1979,1980,1981)
# Observed.t=c(672,1028,538,566,300,400,400,400,400,300,250,
# 450,450,13,23,23,2,400,20,389,537,983,1698,1132,1702,1031)

# Lynx rufus, California, GPPD data set 208.
# Time.t=c(1934,1935,1936,1938,1940,1941,1942,1943,1944,1945,
# 1946,1947,1948,1949,1950,1951,1952,1954,1955,1956,1957,1958,
# 1959,1960,1961,1962,1963,1964,1965,1966,1967,1968,1969,1970,
# 1971,1972,1973,1974,1975,1976,1977,1978,1979,1980,1981)
# Observed.t=c(1994,1436,1290,2292,2776,3239,1923,2898,2063,1730,
# 1072,689,169,375,293,239,336,223,228,276,202,142,175,304,205,
# 295,361,221,221,241,244,381,588,319,588,686,1244,1393,2203,
# 3618,4445,6928,7809,9595,9337)

# Lynx rufus, Michigan, GPPD data set 218.
# Time.t=c(1936,1937,1939,1940,1941,1942,1943,1944,1945,1946,
# 1947,1948,1949,1950,1951,1952,1954,1955,1956,1957,1958,1962,
# 1963,1964,1966, 1969,1976,1977,1978,1979,1980,1981)
# Observed.t=c(1134,811,598,528,529,375,2538,2802,2910,2363,
# 2174,2063,1547,1753,1443,1836,696,847,880,762,200,588,494,265,
# 400,300,341,331,386,597,223,200)

# Lynx rufus, Maine, GPPD data set 216.
# Time.t=c(1934,1935,1936,1937,1942,1943,1944,1945,1946,1947,
# 1948,1949,1950,1951,1952,1953,1954,1956,1957,1958,1959,1961,
# 1962,1963,1964,1965,1966,1968,1970,1971,1972,1973,1974,1975,
# 1976,1977,1978,1979,1980,1981)
# Observed.t=c(644,911,687,400,133,105,184,1044,181,178,489,100,
# 263,83,106,795,667,695,263,198,221,278,231,588,269,152,233,153,
# 730,654,641,573,544,373,436,389,278,318,381,345)

# Lynx rufus, Wisconsin, GPPD data set 239.
# Time.t=c(1934,1935,1936,1937,1938,1940,1941,1942,1943,1944,
# 1945,1946,1947,1948,1949,1950,1951,1952,1954,1956,1959,1960,
# 1969,1970,1971,1974,1975,1976,1977,1978,1979,1980,1981)
# Observed.t=c(302,428,513,461,593,180,283,191,765,384,1048,577,
# 427,437,482,525,724,740,524,321,479,869,148,148,147,205,223,
# 275,163,223,131,81,168)

```

```

# Elk, central valley of Grand Teton National Park, cited in
# Dennis and Taper (1994 Ecological Monographs).
# Observed.t = c(1627,1527,824,891,1140,1322,1431,1733,1131,1611,
# 1644,1991,1762,1076,1442,1800,1667,1558,1396,1753,1453,1804)
# Time.t = c(1963,1964,1965,1966,1967,1968,1969,1970,1971,1972,
# 1973,1974,1975,1976,1977,1978,1979,1980,1981,1982,1984,1985)

# Rangeland grasshoppers, MT western mountain region, from
# Kemp and Dennis 1993 Oecologia)
# Observed.t=c(5.7981,7.7194,4.8022,3.9397,11.8806,10.7568,8.9586,
# 10.6619,6.5895,4.4905,3.0684,6.9973,5.3986,4.2777,6.1166,7.2989,
# 5.0850,4.8298,5.3997,4.7679,4.5073,1.9714,4.1007,5.6403,3.0492,
# 2.8144,4.4071,2.4121,3.2233,1.4236,2.3404,10.5283,7.6872,2.7305,
# 3.4570,5.4336,3.1487,3.8315,4.4805)
# Time.t=c(1948,1951,1952,1953,1954,1955,1956,1957,1958,1959,1960,
# 1961,1962,1963,1964,1965,1966,1967,1968,1969,1970,1971,1972,1973,
# 1974,1975,1977,1978,1979,1980,1981,1983,1984,1985,1986,1987,1988,
# 1989,1990)

# Log-transform the observations to carry out all the calculations
# in this program.
log.obs = log(Observed.t)
#-----

#-----
#          PARAMETER ESTIMATION, PARAMETRIC BOOTSTRAP AND PREDICTIONS
#-----
# Before doing the calculations, the user has to specify ONLY the
# following 4 options:

# 1. Do you want to compute the ML estimates or the REML estimates?
method = "REML" # alternatively, set method = "ML"

# 2. Do you want to plot the predictions?
pred.plot = "TRUE" # Set it to "FALSE" if you do not want to plot the
# predictions

# 3. Do you want to plot the parametric bootstrap distribution of the
# estimates?
pboot.plot = "TRUE" # Set it to "FALSE" if you do not want to plot the
# bootstrap distribution of the estimates

# 4. How many bootstrap replicates?
NBoot = 1000

#-----
# 5. THE FOLLOWING LINES OF CODE COMPUTE THE ESTIMATES, PREDICTIONS,
# AND PARAMETRIC BOOTSTRAP CONFIDENCE INTERVALS. THE USER DOES NOT
# NEED TO MODIFY THESE LINES OF CODE.
#
# THE OUTPUT OF THE FUNCTION 'ROUSS.CALCS' IS A LIST AND THE USER
# CAN RETRIEVE EACH OF THE LIST ELEMENTS PRINTED AND SAVED IN THE
# OBJECT "all.results".

```

```

#
# THE 95% PARAMETRIC BOOTSTRAP FOR BOTH, THE PARAMETERS AND THE
# PREDICTIONS ARE COMPUTED BY THE FUNCTION "ROUSS.CALCS".
#
#-----

all.results = ROUSS.CALCS(Yobs=log.obs,Tvec=Time.t,pmethod=method,
                          nboot=NBoot,plot.pred=pred.plot,
                          plot.bootdists=pboot.plot)

#=====
# RUNNING-PBLRT.R: performs parametric bootstrap likelihood ratio
# test of exponential growth state space model vs. Ornstein-Uhlenbeck
# state space model. The script ROUSS-1.0.R must be in the working
# directory of R.
# Be patient; R is slow.
#=====

#-----
# Load all the OUSS model functions and needed packages
#-----
library("MASS")
source("ROUSSE-1.0.R")

#-----
# USER INPUT SECTION
#-----
# User supplies time series data here into the vector "Observed.t".
# User can substitute R statements to read population abundance data
# from a file into the vector "Observed.t". Do not change the object
# name "Observed.t".
# Times of observation are entered into the vector "Time.t". Do not
# change the object name "Time.t".
# Example data from the North American Breeding Bird Survey, American
# Redstart, record # 02014 3328 08636, 1966-95 (Table 1 in Dennis et
# al. 2006 Ecological Monographs).

Observed.t = c(18,10,9,14,17,14,5,10,9,5,11,11,4,5,4,8,2,3,9,2,4,
7,4,1,2,4,11,11,9,6)
Time.t = c(0,1,2,3,4,5,6,7,8,9,10,11,12,13,14,15,16,17,18,19,20,
21,22,23,24,25,26,27,28,29)

# Log-transform the observations to carry out all the calculations
# in this program.
log.obs = log(Observed.t)
#-----

#-----
# PARAMETER ESTIMATION AND PARAMETRIC BOOTSTRAP LIKELIHOOD RATIO TEST
#-----
# The output contains 6 objects:
# Object 1: "egssml": this is a list that contains the ml estimates
# of the EGSS model, the maximized log likelihood and the AIC value
# under that model.
#
# Object 2: "roussml": this is a list that contains the ml estimates

```

```

# of the OUSS model, the maximized log likelihood and the AIC value
# under that model.
#
# Object 3: "Lam.obs": this is the observed log-likelihood ratio
# statistic given by  $-2 \cdot \ln[L(H0)/L(H1)]$ .
#
# Object 4: "Lam.vec": this is a vector of the bootstrapped values
# of  $-2 \cdot \ln[L(H0)/L(H1)]$ .
#
# Object 5: "pvalue": this is the proportion of the bootstrapped
# values of  $-2 \cdot \ln[L(H0)/L(H1)]$  that are more extreme than the observed
# value of  $-2 \cdot \ln[L(H0)/L(H1)]$ .
#
# Object 6: "Decision.rule": this is a character object that prints
# out the decision of the test (Fail to reject or reject the null
# hypothesis of the EGSS density independent model).
#
# Before doing the calculations, the user has to specify ONLY the
# following 3 options:

# 1. How many bootstrap replicates do you want to use? (Default is
# one thousand)
NBoot = 1000

# 2. At what significance level alpha do you want to test the null
# hypothesis of density independence vs. the alternative of density
# dependence?
my.alpha = 0.05

# 3. Do you want to plot the sampling distribution of the log-
# likelihood ratio statistic  $-2 \cdot \ln[L(H0)/L(H1)]$ ?
plot.it = TRUE

# Performs the bootstrap analysis (be patient):
pblrt.trial = PBLRT.ddpcont(B=NBoot, Yobs=log.obs, Tvec=Time.t,
alpha=my.alpha, plot.PBLR=plot.it)

# Printing results:

# Object 1: "egssml": this is a list that contains the ml estimates
# of the EGSS model, the maximized log likelihood and the AIC value
# under that model.
pblrt.trial$egssml

# Object 2: "roussml": this is a list that contains the ml estimates
# of the OUSS model, the maximized log likelihood and the AIC value
# under that model.
pblrt.trial$roussml

# Object 3: "Lam.obs": this is the observed value of the log-
# likelihood ratio statistic  $-2 \cdot \ln[L(H0)/L(H1)]$ 
pblrt.trial$Lam.obs

# Object 5: "pvalue": this is the proportion of the bootstrapped
# values of  $-2 \cdot \ln[L(H0)/L(H1)]$  that are more extreme than the observed
# value of  $-2 \cdot \ln[L(H0)/L(H1)]$ .
pblrt.trial$pvalue

```

```

# Object 6: "Decision.rule": this is a character object that prints
# out the decision of the test (Fail to reject or reject the null
# hypothesis of density independence)
pblrt.trial$Decision.rule

# To plot the sampling distribution of the likelihood ratio test, we
# recommend producing a trial histogram first, and after a visual
# inspection, eliminating from the plotting range the numerical
# extremes, which should be very few.
#
# The script lines below will display an example using the American
# Redstart data set.

# Histogram of the pboot LRT with the observed LRT in red.
hist(pblrt.trial$Lam.vec)
abline(v=pblrt.trial$Lam.obs,lwd=2,col="red")

# After plotting, note that the American Redstart example has
# numerical extremes around -600 and around +600.
# Re-do the plot zooming into the bulk of the bootstrap distribution.
hist(pblrt.trial$Lam.vec[abs(pblrt.trial$Lam.vec)<100],
      xlab="Bootstrap values of  $-2*\ln[L(H0)/L(H1)]$ ",main="")
abline(v=pblrt.trial$Lam.obs,lwd=2,col="red")

#=====
# ROUSSE-1.0.R: Functions used in statistical inferences for the
# Ornstein-Uhlenbeck state space model. This script should be present
# in the working directory of R before running either RUNNING-ROUSS.R
# or RUNNING-PBLRT.R.
#=====

## PART I) OUSS model R functions
## PART II) EGSS model R functions
## PART III) Density dependence vs. Density independence
## Parametric Bootstrap Likelihood Ratio Test (PBLRT) functions

## All EGSS Functions originally published in
## Humbert, J.-Y., Mills, S., Horne, J. S. and Dennis, B. 2009. A
## better way to estimate population trend. Oikos 118:1940-1946.

# PART I): The OUSS functions -----

# 1. Negative log-likelihood score, for ML estimation or Model
# Selection.
# ML objective function "negloglike.OU.ml" is negative of log-
# likelihood.
# The function uses a multivariate normal log-
# likelihood (Eq. 19). The three function arguments are:
# fguess, vector of parameters (transformed to the real line),
# yt, vector of time series of log observed abundances (cannot
# have 0's ), tt, vector of observation times.
negloglike.OU.ml <- function(fguess,yt,tt){
  mu = fguess[1]
  guess = exp(fguess[2:4]) # Constrains parameters > 0
  theta = guess[1]

```

```

betasq = guess[2]
tausq = guess[3]
q = length(yt) - 1
qp1 = q+1
Var.inf = betasq/(2*theta) # Stationary variance
ss = tt[2:qp1] - tt[1:q]
t.cols = matrix(rep(tt,each=qp1),nrow=qp1,ncol=qp1, byrow=FALSE)
t.rows = t(t.cols)
abs.diffs = abs(t.rows-t.cols)
V = Var.inf*exp(-theta*abs.diffs)
diag(V) = diag(V) + rep(tausq,qp1)
mu.vec = rep(mu,qp1)
neglogl = (qp1/2)*log(2*pi)+(1/2)*log(det(V))+
  (1/2)*(yt-mu.vec)%*%ginv(V)%*%(yt-mu.vec)
return(neglogl)
}

# 2. Negative log-likelihood for REML estimation or Model
# Selection (Eq. 22).
# REML objective function "negloglike.OU.reml" is negative of
# log-likelihood for first differences of the log-scale observations.
# The three function arguments are:
# phi, vector of parameters (transformed to the real line),
# yt, vector of time series observations (log scale),
# tt, vector of observation times.
# The function performs the differencing.
negloglike.OU.reml=function(phi,yt,tt) {
  theta = exp(phi[1]) # Constrains theta > 0.
  betasq = exp(phi[2]) # Constrains betasq > 0.
  tausq = exp(phi[3]) # Constrains tausq > 0.
  Var.inf = betasq/(2*theta) # Recurring quantity.
  q = length(yt)-1
  qp1 = q+1
  ss = tt[2:qp1]-tt[1:q] # Time intervals.
  t.cols = matrix(rep(tt,each=qp1),nrow=qp1,ncol=qp1, byrow=FALSE)
  t.rows = t(t.cols)
  abs.diffs = abs(t.rows-t.cols)
  Sigma.mat = Var.inf*exp(-theta*abs.diffs)
  Itausq = matrix(0,qp1,qp1)
  diag(Itausq) = rep(tausq,qp1)
  V = Sigma.mat+Itausq
  Dmat = cbind(-diag(1,q),matrix(0,q,1)) +
    cbind(matrix(0,q,1),diag(1,q)) # Differencing matrix.
  Phi.mat = Dmat%*%V%*%t(Dmat) # REML var-cov matrix.
  wt = yt[2:qp1]-yt[1:q]
  ofn = (q/2)*log(2*pi)+0.5*log(det(Phi.mat)) +
    0.5*wt%*%ginv(Phi.mat)%*%wt # ginv() is numerically
    # more robust than solve().
  return(ofn)
}

# 3. rand.MVN: Multivariate Normal random number generator:
# n = number of random samples of a MVN vector,
# mu = mean vector of the MVN distribution,
# cov.mat = Variance-covariance matrix of the MVN distribution.
randmvn = function(n,mu.vec, cov.mat) {
  p = length(mu.vec)

```

```

Tau = chol(cov.mat)
Zmat = matrix(rnorm(n=p*n,mean=0,sd=1),nrow=p,ncol=n)
      # generate normal deviates outside loop.
out = matrix(0,nrow=p,ncol=n)
for(i in 1:n) {
  Z = Zmat[,i]
  out[,i] = t(Tau)%*%Z + mu.vec
}
return(out)
}

# 4. Simulation function: requires as input parameter values and
# a vector of observation times. The multivariate Normal model (see
# eq. 19) is used to simulate the data.
# nsims = number of bootstrap replicates to simulate.
# parms = vector of parameter values = c(mu_hat, theta_hat,
#   betasq_hat,tausq_hat), where 'hat' denotes neither the
#   ML or the REML estimates.
# Tvec = vector of ORIGINAL observation times (t_0, t_1, t_2, ...,
#   t_q)
ROUSS.sim = function(nsims,parms,Tvec) {
  tt = Tvec-Tvec[1]
  mu = parms[1]
  theta = parms[2]
  betasq = parms[3]
  tausq = parms[4]
  q = length(tt)-1
  qp1 = q+1
  Var.inf = betasq/(2*theta)
  ss = tt[2:qp1]-tt[1:q]
  t.cols = matrix(rep(tt,each=qp1),nrow=qp1,ncol=qp1,byrow=FALSE)
  t.rows = t(t.cols)
  abs.diffs = abs(t.rows-t.cols)
  V = Var.inf*exp(-theta*abs.diffs)
  diag(V) = diag(V)+rep(tausq,qp1)
  m.vec = rep(mu,qp1)
  out = randmvn(n=nsims,mu.vec=m.vec,cov.mat=V)
  return(out)
}

# 5. Computing rough initial guesses for ML estimation.
# Yobs = log(Observed time series of abundances),
# Tvec = vector of sampling times.
guess.calc = function(Yobs,Tvec) {
  T.t = Tvec-Tvec[1]      # For calculations, time starts at zero.
  q = length(Yobs)-1     # Number of time series transitions, q.
  qp1 = q+1             # q+1 gets used a lot, too.
  S.t = T.t[2:qp1]-T.t[1:q] # Time intervals.
  Ybar = mean(Yobs)
  Yvar = sum((Yobs-Ybar)*(Yobs-Ybar))/q
  mu1 = Ybar             # Kludge an initial value for theta based
                        # on mean of Y(t+s) given Y(t).
  th1 = -mean(log(abs((Yobs[2:qp1]-mu1)/(Yobs[1:q]-mu1))))/S.t
  bsq1 = 2*th1*Yvar/(1+2*th1) # Moment estimate using stationary
  tsq1 = bsq1           # variance, with betasq=tausq.
  out = c(mu1,th1,bsq1,tsq1)
  return(abs(out))
}

```



```

}

# 6. Computing the ML estimates of the OUSS model, maximized log-
# likelihood and the AIC score:
#   Yobs = log(Observed time series of abundances),
#   Tvec = vector of sampling times,
#   parms.guess = vector of initial guesses for the parameters
#           = c(mu_hat,theta_hat,betasq_hat,tausq_hat)
ROUSS.ML = function(Yobs,Tvec,parms.guess) {
  tt = Tvec-Tvec[1]
  q = length(tt)-1
  qp1 = q+1
  guess.optim = c(parms.guess[1],log(parms.guess[2:4]))
  optim.out = optim(par=guess.optim,fn=negloglike.OU.ml,
    method="Nelder-Mead",yt=Yobs,tt=tt)
  mles = c(optim.out$par[1],exp(optim.out$par[2:4]))
  lnL.hat = - optim.out$value[1]
  AIC = -2*lnL.hat + 2*4      # where 4 = length(mles)...
  out = list(mles=mles, lnL.hat = lnL.hat, AIC=AIC)
  return(out)
}

# 7. Computing the REML estimates of the OUSS model, maximized log-
# likelihood and the AIC score:
#   Yobs = log(Observed time series of abundances),
#   Tvec = vector of sampling times,
#   parms.guess = vector of initial guesses for the parameters
#           = c(mu_hat,theta_hat,betasq_hat,tausq_hat).
ROUSS.REML = function(Yobs,Tvec,parms.guess) {
  tt = Tvec-Tvec[1]
  q = length(tt)-1
  qp1 = q+1
  ss = tt[2:qp1]-tt[1:q]
  guess.optim = log(parms.guess[2:4])
  optim.out = optim(par = guess.optim,fn=negloglike.OU.reml,
    method="Nelder-Mead",yt=Yobs,tt=tt)
  remls = exp(optim.out$par)
  lnL.hat = -optim.out$value[1]
  theta.reml = remls[1]
  betasq.reml = remls[2]
  tausq.reml = remls[3]
  Var.inf = betasq.reml/(2*theta.reml)
  vx = matrix(1,qp1,qp1)
  for (ti in 1:q) {
    vx[(ti+1):qp1,ti] = exp(-theta.reml*cumsum(ss[ti:q]))
    vx[ti,(ti+1):qp1] = vx[(ti+1):qp1,ti]
  }
  Sigma.mat = vx*Var.inf
  Itausq = matrix(0,qp1,qp1)
  diag(Itausq) = rep(tausq.reml,qp1)
  V.reml = Sigma.mat+Itausq
  j = matrix(1,qp1,1)
  Vinv = ginv(V.reml)
  mu.reml = (t(j)%*%Vinv%*%Yobs)/(t(j)%*%Vinv%*%j) # REML estimate
                                                    # of mu.
  out = list(remls=c(mu.reml,theta.reml,betasq.reml,tausq.reml),
    lnLhat = lnL.hat)
}

```

```

    return(out)
}

# 8. Parametric Bootstrap function.
# B = number of bootstrap replicates,
# parms = c(mu.mle,theta.mle,betasq.mle,tausq.mle) = ML estimates of
# the parameters with the original time series,
# tt = vector of observation times (t_0, t_1, t_2, ..., t_q) from the
# original time series.
# If REML="TRUE", then the parametric bootstrap is computed for REML
# estimation. In that case, 'parms' must contain the REML estimates
# for the original time series.
ROUSS.pboot = function(B=2,parms,Yobs,Tvec,REML="FALSE",
                      plot.it="FALSE") {
  tt = Tvec-Tvec[1]
  nparms = length(parms)
  preds.boot = matrix(0,nrow=B,ncol=length(tt))
  if(REML=="TRUE") {
    boot.remles = matrix(0,nrow=B,ncol=nparms+1)
    all.sims = ROUSS.sim(nsims=B,parms=parms,Tvec=Tvec)
    reml.preds = ROUSS.predict(parms=parms,Yobs=Yobs,Tvec=Tvec,
                              plot.it="FALSE")[,2]
    for(b in 1:B) {
      both.timeseries = all.sims[,b]
      remles.out = ROUSS.REML(Yobs=both.timeseries,Tvec=Tvec,
                             parms.guess=parms)
      boot.remles[b,] = c(remles.out$remls,remles.out$lnLhat)
      preds.boot[b,] = ROUSS.predict(parms=remles.out$remls,
                                     Yobs=both.timeseries,Tvec=Tvec,
                                     plot.it="FALSE")[,2]
    }
  }
  CIs.mat = apply(boot.remles,2,FUN=function(x){quantile(x,
                                                         probs=c(0.025,0.975))})
  CIs.mat = rbind(CIs.mat[1,1:4],parms,CIs.mat[2,1:4])
  rownames(CIs.mat) = c("2.5%","REMLE","97.5%")
  colnames(CIs.mat) = c("mu","theta","betasq","tausq")
  preds.CIs = apply(preds.boot,2,FUN=function(x){quantile(x,
                                                         probs=c(0.025,0.975))})
  preds.CIs = t(rbind(Tvec,preds.CIs[1,],reml.preds,
                    preds.CIs[2,]))
  colnames(preds.CIs) = c("Year","2.5%","REMLE","97.5%")
  boot.list = list(boot.remles=boot.remles,CIs.mat=CIs.mat,
                  preds.CIs=preds.CIs)
  if(plot.it=="TRUE") {
    X11()
    par(mfrow=c(2,2))
    hist(boot.remles[,1],main=expression(hat(mu)),xlab="")
    abline(v=parms[1],lwd=2,col="red")
    hist(boot.remles[,2],main=expression(hat(theta)),
         xlab="")
    abline(v=parms[2],lwd=2,col="red")
    hist(boot.remles[,3],main=expression(hat(beta^2)),
         xlab="")
    abline(v=parms[3],lwd=2,col="red")
    hist(boot.remles[,4],main=expression(hat(tau^2)),
         xlab="")
    abline(v=parms[4],lwd=2,col="red")
  }
}

```

```

    }
    return(boot.list)
} else {
boot.mles = matrix(0,nrow=B,ncol=nparms+2)
all.sims = ROUSS.sim(nsims=B,parms=parms,Tvec=Tvec)
ml.preds = ROUSS.predict(parms=parms,Yobs=Yobs,
                        Tvec=Tvec,plot.it="FALSE")[,2]
for(b in 1:B) {
  both.timeseries = all.sims[,b]
  mles.out = ROUSS.ML(Yobs=both.timeseries,Tvec=Tvec,
                    parms.guess=parms)
  boot.mles[b,] = c(mles.out$mles, mles.out$lnL.hat,
                  mles.out$AIC)
  preds.boot[b,] = ROUSS.predict(parms=mles.out$mles,
                                Yobs=both.timeseries,Tvec=Tvec,
                                plot.it="FALSE")[,2]
}
CIs.mat = apply(boot.mles,2,FUN=function(x){quantile(x,
             probs=c(0.025,0.975))})
CIs.mat = rbind(CIs.mat[1,1:4],parms,CIs.mat[2,1:4])
rownames(CIs.mat) = c("2.5%","MLE","97.5%")
colnames(CIs.mat) = c("mu","theta","betasq","tausq")
preds.CIs = apply(preds.boot,2,FUN=function(x){quantile(x,
             probs=c(0.025,0.975))})
preds.CIs = t(rbind(Tvec,preds.CIs[1,],ml.preds,preds.CIs[2,]))
colnames(preds.CIs) = c("Year","2.5%","MLE","97.5%")
boot.list = list(boot.mles=boot.mles,CIs.mat=CIs.mat,
                preds.CIs=preds.CIs)
if(plot.it=="TRUE") {
  X11()
  par(mfrow=c(2,2))
  hist(boot.mles[,1],main=expression(hat(mu)),
       xlab="")
  abline(v=parms[1],lwd=2,col="red")
  hist(boot.mles[,2],main=expression(hat(theta)),
       xlab="")
  abline(v=parms[2],lwd=2,col="red")
  hist(boot.mles[,3],main=expression(hat(beta^2)),
       xlab="")
  abline(v=parms[3],lwd=2,col="red")
  hist(boot.mles[,4],main=expression(hat(tau^2)),
       xlab="")
  abline(v=parms[4],lwd=2,col="red")
}
return(boot.list)
} # End if/else
}

# ROUSS.pboot(B=20,parms=linx.remls,Yobs=log(Observed.t),
#   Tvec=Time.t,REML="TRUE",plot.it="FALSE")

# 9. Function to compute the predicted trajectory of the unobserved
# process. The arguments are:
#   parms = ML or REML estimates of c(mu,theta,betasq,tausq),
#   whichever you prefer,
#   Yobs = Log observations,
#   Tvec = vector of original observation times (t_0,t_1,...,t_q).

```

```

ROUSS.predict = function(parms, Yobs, Tvec, plot.it="TRUE") {
  qp1 = length(Yobs)
  q = qp1-1
  tt = Tvec - Tvec[1]
  ss = tt[2:qp1] - tt[1:q]
  mu = parms[1]
  theta = parms[2]
  betasq = parms[3]
  tausq = parms[4]
  Var.inf = betasq/(2*theta)
  t.cols = matrix(rep(tt, each=qp1), nrow=qp1, ncol=qp1, byrow=FALSE)
  t.rows = t(t.cols)
  abs.diffs = abs(t.rows-t.cols)
  Sigma.mat = Var.inf*exp(-theta*abs.diffs)
  Itausq = matrix(0, qp1, qp1)
  diag(Itausq) = rep(tausq, qp1)
  V = Sigma.mat+Itausq
  Predict.t = rep(0, qp1)
  Muvec = rep(mu, q)
  for (tj in 1:qp1) {
    Y.omitj = Yobs[-tj] # Omit observation at time tj.
    V.omitj = V[-tj,-tj] # Omit row tj and col tj from var-cov
                        # matrix.
    V12 = V[tj,-tj] # Submatrix: row tj without col tj.
    Predict.t[tj] = mu+V12%*%ginv(V.omitj)%*%(Y.omitj-Muvec)
                  # Usual expression for conditional MV normal mean.
  }
  Predict.t = exp(Predict.t)
  if(plot.it=="TRUE") {
    # Plot the data & model-fitted values
    X11()
    plot(Time.t, exp(Yobs), xlab="Time", ylab="Population
          abundance", type="b", cex=1.5, main="Predicted (--
          and observed (-o-) abundances")
    # Population data are circles.
    par(lty="dashed") # Predicted abundances are dashed line.
    points(Tvec, Predict.t, type="l", lwd=1)
  }
  return(cbind(Tvec, Predict.t))
}

# 10. Function to run the estimation, compute the predictions and
# run a parametric bootstrap.
ROUSS.CALCS = function(Yobs, Tvec, pmethod="ML", nboot,
                      plot.pred="TRUE", plot.bootdists="TRUE") {
  # 10.1 Compute a rough guess of the parameter estimates to
  # initialize the search:
  guessscal = guess.calc(Yobs=log.obs, Tvec=Tvec)
  # 10.2 Compute either the ML or the REML estimates, according
  # to what was specified in point 1 above.
  if (pmethod=="ML") {
    best.guess = ROUSS.ML(Yobs=Yobs, Tvec=Tvec,
                        parms.guess=guessscal)
    AIC = best.guess[[3]]
    reml.option = "FALSE"
  } else if (pmethod=="REML") {
    best.guess = ROUSS.REML(Yobs=Yobs, Tvec=Tvec,

```

```

        parms.guess=guessscal)
    reml.option = "TRUE"
} else {
    print("Error: ML and REML are the only options allowed for
        'method' ")
}
# 10.3 Parameter estimates and maximized log-likelihood
# (will be printed at the end).
parms.est = best.guess[[1]]
lnLhat = best.guess[[2]]

# 10.4 Computing the predictions.
# rouss.preds = ROUSS.predict(parms=parms.est,
#                             Yobs=Yobs,Tvec=Tvec,plot.it=plot.pred)
# print("These are the predictions of what the true, unobserved
#     population abundances were")
# print(rouss.preds)

# 10.5 Parametric bootstrap: computing both, parameters and
# predictions 95 % CI's.
pboot.calcs = ROUSS.pboot(B=nboot,parms=parms.est,Yobs=Yobs,
                          Tvec=Tvec,REML=reml.option,plot.it=plot.bootdists)
print("These are the predictions of what the true, unobserved
    population abundances were, along with 95% CI's")
print(pboot.calcs$preds.CIs)
rouss.preds = ROUSS.predict(parms=parms.est,Yobs=Yobs,
                            Tvec=Tvec,plot.it=plot.pred)
if(plot.pred=="TRUE") {
    points(Tvec,pboot.calcs$preds.CIs[,2],type="l",col="blue")
    points(Tvec,pboot.calcs$preds.CIs[,4],type="l",col="blue")
}
print("This is the matrix of Parametric Bootstrap 95% CI's
    along with the estimates")
print(pboot.calcs$CIs.mat)
print("Maximized log-likelihood score")
print(lnLhat)
if(pmethod=="ML") {
    print("AIC score")
    print(AIC)
    out = list(parms.est=parms.est,lnLhat=lnLhat,AIC=AIC,
               pbootmat=pboot.calcs[[1]],pboot.cis=pboot.calcs[[2]],
               pboot.preds=pboot.calcs$preds.CIs)
} else {
    out = list(parms.est=parms.est,lnLhat=lnLhat,
               pbootmat=pboot.calcs[[1]],pboot.cis=pboot.calcs[[2]],
               pboot.preds=pboot.calcs$preds.CIs)
}
return(out)
}

# PART II): The EGSS functions -----
# 11. Negative Log-Likelihood function for the EGSS model.
negloglike.EGSS.ml = function(theta,yt,tt) {
    mu = theta[1]
    sigmasq = exp(theta[2])
    tausq = exp(theta[3])

```

```

xo = theta[4]
q = length(yt) - 1
qp1 = q+1
yt = matrix(yt,nrow=qp1,ncol=1) # makes data a matrix object.
vx = matrix(0,qp1,qp1)
for(i in 1:q) {
  # Create the matrix with the correct dimensions
  # instead of relying on R's automatic recycling-
  # to-match-dimensions property.
  vx[((i+1):qp1),((i+1):qp1)] = matrix(1,(qp1-i),
                                         (qp1-i))*tt[(i+1)]
}
Sigma.mat = sigmasq*vx
Itausq = matrix(rep(0,(qp1*qp1)),nrow=qp1,ncol=qp1)
diag(Itausq) = rep(tausq,qp1)
V = Sigma.mat + Itausq
mu.vec = matrix((xo+mu*tt),nrow=qp1,ncol=1)
return(((qp1/2)*log(2*pi) + 0.5*log(det(V)) + 0.5*(t(yt-
mu.vec)%*%ginv(V)%*%(yt-mu.vec)))
}

# 12. Function to propose initial values of the parameters
# to feed the parameter estimation function under the EGSS model.
init.egss = function(Yobs,Tvec) {
  q = length(Yobs)-1 # Number of time series transitions, q.
  qp1 = q+1 # q+1 gets used a lot, too.
  T.t = Tvec-Tvec[1] # For calculations, time starts at zero.
  Ybar = mean(Yobs)
  Tbar = mean(T.t)
  mu.egoe = sum((T.t-Tbar)*(Yobs-Ybar))/sum((T.t-Tbar)*(T.t-Tbar))
  x0.egoe = Ybar-mu.egoe*Tbar
  ssq.egoe = 0
  Yhat.egoe = x0.egoe+mu.egoe*T.t
  tsq.egoe = sum((Yobs-Yhat.egoe)*(Yobs-Yhat.egoe))/(q-1)
  S.t = T.t[2:qp1]-T.t[1:q] # Time intervals.
  Ttr = sqrt(S.t)
  Ytr = (Yobs[2:qp1]- Yobs[1:q])/Ttr
  mu.egpn = sum(Ttr*Ytr)/sum(Ttr*Ttr)
  Ytrhat = mu.egpn*Ttr
  ssq.egpn = sum((Ytr-Ytrhat)*(Ytr-Ytrhat))/(q-1)
  tsq.egpn = 0
  x0.egpn = Yobs[1]
  mu0 = (mu.egoe+mu.egpn)/2
  ssq0 = ssq.egpn/2
  tsq0 = tsq.egoe/2
  xo.out = x0.egoe
  return(c(mu0,ssq0,tsq0,xo.out))
}

# 13. Function to optimize the negative log-likelihood and return
# parameter estimates, likelihood score and AIC, BIC value.
EGSS.ML = function(Yobs,Tvec,parms.guess) {
  tt = Tvec-Tvec[1]
  q = length(tt)-1
  qp1 = q+1
  guess.optim = c(parms.guess[1],log(parms.guess[2:3]),
                 parms.guess[4])
}

```

```

optim.out = optim(par=guess.optim,fn=negloglike.EGSS.ml,
                  method="Nelder-Mead",yt=Yobs,tt=tt)
mles = c(optim.out$par[1],exp(optim.out$par[2:3]),
         optim.out$par[4])
lnL.hat = - optim.out$value[1]
AIC = -2*lnL.hat + 2*4 # where 4 is the number of parameters.
out = list(mles=mles,lnL.hat=lnL.hat,AIC=AIC)
return(out)
}

# guess.egss = init.egss(Yobs=yt,Tvec=Time.t)
# trial.egssml = EGSS.ML(Yobs=yt,Tvec=Time.t,parms.guess=guess.egss)

# 14. Simulation from the EGSS model for parametric bootstrap:
# simulate data using the observed time intervals and the ML
# estimates. The simulation is greatly eased by the fact that
# the log observations are multivariate normally distributed.

EGSS.sim = function(nsims,parms,Tvec) {
  tt = Tvec-Tvec[1]
  mu = parms[1]
  sigmasq = parms[2]
  tausq = parms[3]
  xo = parms[4]
  q = length(tt)-1
  qp1 = q+1
  vx = matrix(0,qp1,qp1)
  for(i in 1:q) {
    vx[((i+1):qp1),((i+1):qp1)] = matrix(1,(qp1-i),(qp1-
                                          i))*tt[(i+1)]
  }
  Sigma.mat = sigmasq*vx
  Itausq = matrix(rep(0,(qp1*qp1)),nrow=qp1,ncol=qp1)
  diag(Itausq) = rep(tausq,qp1)
  V = Sigma.mat + Itausq
  mu.vec = matrix((xo+mu*tt),nrow=qp1,ncol=1)
  out = randmvn(n=nsims,mu.vec=mu.vec,cov.mat=V)
  return(out)
}

# PART III): PBLR function -----

# 15. Function to do a PBLRT between the EGSS model (null)
# and the OUSS model (alternative).
PBLRT.ddpcont = function(B=10,Yobs,Tvec,alpha=0.05,plot.PBLR=TRUE) {
  # Estimation under the null Ho: the EGSS model.
  guess.egss = init.egss(Yobs=Yobs,Tvec=Tvec)
  egssml = EGSS.ML(Yobs=Yobs,Tvec=Tvec,parms.guess=guess.egss)
  lnL.Ho = egssml$lnL.hat
  # Estimation under the alternative H1: the OUSS model
  guess.rouss = guess.calc(Yobs=Yobs,Tvec=Tvec)
  roussml = ROUSS.ML(Yobs=Yobs,Tvec=Tvec,parms.guess=guess.rouss)
  lnL.H1 = roussml$lnL.hat
  # Computing the observed Lam.obs = -2*ln[L(H0)/L(H1)].
  Lam.obs = -2*(lnL.Ho-lnL.H1)
  # Simulating under H0 using the ML estimates

```

```

mlsforboot = egssml$mles
sims.mat = EGSS.sim(nsims=B,parms=mlsforboot,Tvec=Tvec)
# Looping over the simulations and maximizing the likelihood
# for both models each time and computing the bootstrapped
# values of Lam.boot =  $-2*\ln[L(H0)/L(H1)]$ .
Lam.vec = rep(0,B)
for(b in 1:B) {
  # Estimating parameters and maximizing under the null.
  Yobs.b = sims.mat[,b]
  egssml.b = EGSS.ML(Yobs=Yobs.b,Tvec=Tvec,
                    parms.guess=mlsforboot)
  lnL.Ho.b = egssml.b$lnL.hat
  # Estimating parameters and maximizing under the alternative.
  guess.rouss.b = guess.calc(Yobs=Yobs.b,Tvec=Tvec)
  rousssml.b = ROUSS.ML(Yobs=Yobs.b,Tvec=Tvec,
                       parms.guess=guess.rouss.b)
  lnL.H1.b = rousssml.b$lnL.hat
  # Computing the bootstrapped likelihood ratio.
  Lam.boot =  $-2*(\ln L.Ho.b - \ln L.H1.b)$ 
  Lam.vec[b] = Lam.boot
}
# Computing the proportion of the simulations that have a
# more extreme Lamb.boot value than the observed Lamb.obs.
pval = sum(Lam.vec>Lam.obs)/B
Decision.rule = "Fail to Reject Density Independence"
if(pval<alpha) {
  Decision.rule = "Reject Density Independence"
}
# Return the vector of Lam.boot values and
# a plot if plot.PBLR=TRUE
out = list(egssml=egssml,roussml=roussml,Lam.obs=Lam.obs,
          Lam.vec=Lam.vec,pvalue=pval,Decision.rule=Decision.rule)
if(plot.PBLR==TRUE) {
  hist(Lam.vec,main="P-boot distribution of  $-2*\ln[L(H0)/L(H1)]$ ")
  abline(v=Lam.obs,col="red")
}
return(out)
}

```
